# Supplementary material for: NPAS2 Contributes to Liver Fibrosis by Direct Transcriptional Activation of Hes1 in Hepatic Stellate Cells
Source: PubMed Central journal article supplement — Mol Ther Nucleic Acids. 2019 Oct 31;18:1009–22. doi: 10.1016/j.omtn.2019.10.025 (PMC6889679; doi:10.1016/j.omtn.2019.10.025), 2019-10-31
Supplement: mmc1.pdf [file mmc1.pdf]

OMTN, Volume 18

## **Supplemental Information**

### **NPAS2 Contributes to Liver Fibrosis by Direct Transcriptional Activation of Hes1 in Hepatic Stellate Cells**

**Tao Yang, Peng Yuan, Yi Yang, Ning Liang, Qian Wang, Jing Li, Rui Lu, Hongxin Zhang, Jiao Mu, Zhaoyong Yan, and Hulin Chang**

## Supplementary Figures:

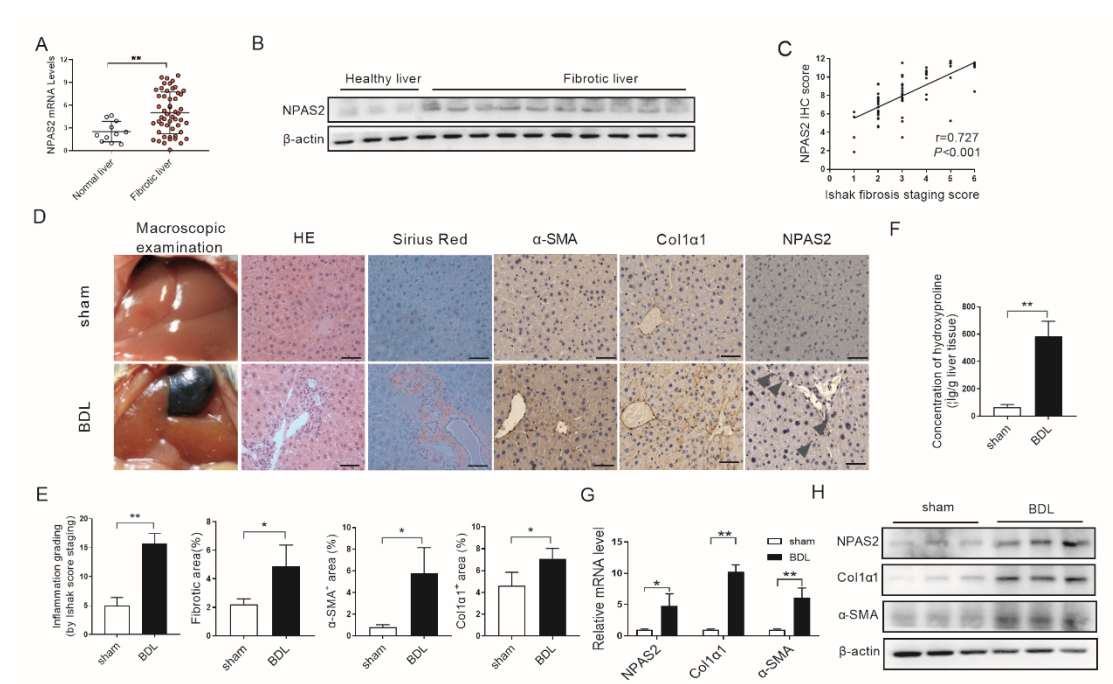

**Figure S1. Expression levels of NPAS2 in human LF specimens and BDL-induced LF.**

(A and B) qRT-PCR and western blotting analyses for NPAS2 expression were performed in human liver tissues (n=63). (C) Pearson's correlation analyses of NPAS2 IHC scores with Ishak scores of picosirius red staining ( $r=0.727$ ,  $P<0.01$ , n=63). (D) Representative results to evaluate liver fibrosis progression. (E) Semiquantification results to statistically analyze fibrosis progression indicated in Figure 1D. (F) Liver hydroxyproline content was analyzed to compare the fibrosis progression after CCl<sub>4</sub> or BDL induced injuries. (G and H) Classical fibrosis related genes was analyzed to compare the fibrosis progression stage of different groups at mRNA level and protein level (n=8-10 for each group). Data shown are the mean  $\pm$  S.E.M. from three independent experiments.  $P < 0.05$ .

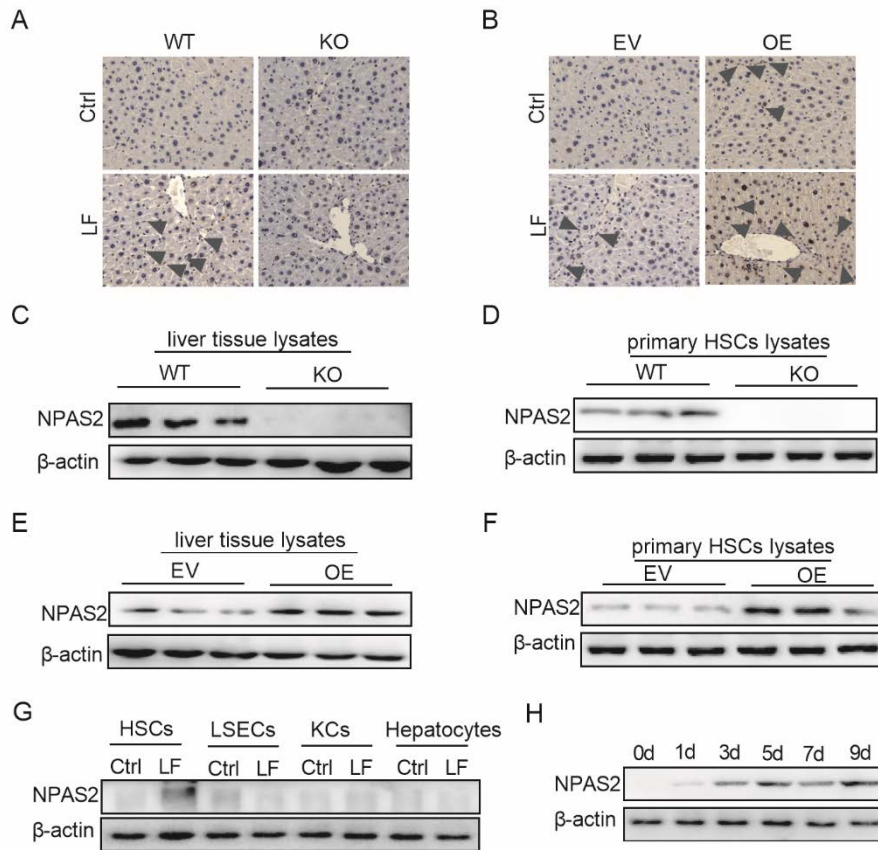

**Figure S2. Expression level of NPAS2 in liver lysates and primary cells lysates.**

(A) IHC analysis for expression of NPAS2 in WT and KO liver fibrosis mice. (B) IHC analysis for expression of NPAS2 in WT and KO liver EV fibrosis mice. (C and D) Western blotting analysis for expression of NPAS2 in whole liver lysates and primary HSCs of WT and KO mice. (E and F) Western blotting analysis for expression of NPAS2 in whole liver lysates and primary HSCs of EV and OE mice. (G) Western blotting analysis for expression of NPAS2 in primary hepatocytes, HSCs, LSECs and Kupffer cells after liver injury. (H) Western blotting analysis for expression of NPAS2 in primary HSCs from WT mice at 0, 1, 3, 5, 7, 9 day.

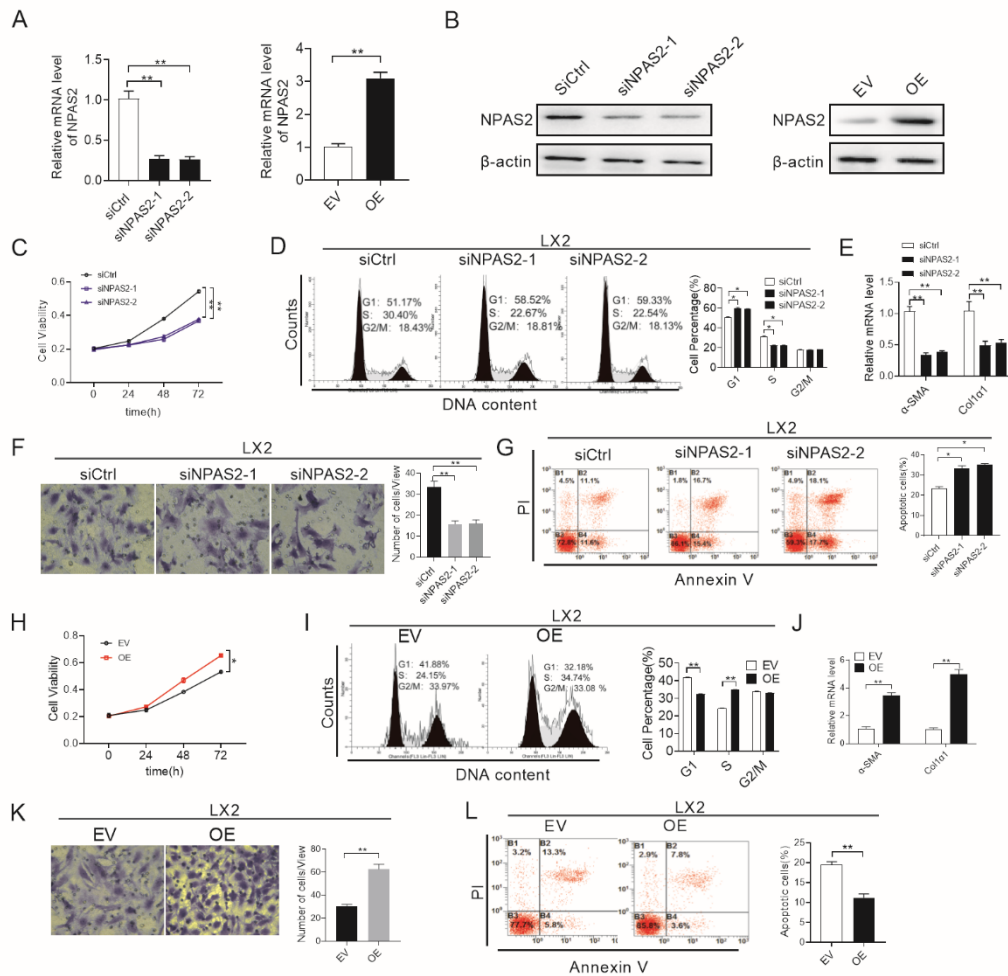

**Figure S3. NPAS2 promotes HSCs activation**

(A and B) qRT-PCR and western blot analyses for NPAS2 expression were performed in LX2 cells, which were transiently transfected with expression vector or siRNA as indicated. NPAS2, expression vector encoding NPAS2; EV, empty vector; siNPAS2-1 and siNPAS2-2, siRNAs against NPAS2; siCtrl, control siRNA. (C and H) MTS assays for LX2 cells proliferation with treatment with treatment as indicated. (D and I) Cell cycle analysis by flow cytometry in LX2 cells proliferation with treatment as indicated. (E and J) Col1 $\alpha$ 1 and  $\alpha$ -SMA mRNA expression in LX2 cells with treatment as indicated. (F and K) Transwell matrigel invasion assay for cell invasion ability of LX2 cells with treatment as indicated. (G and L) Flow cytometry analysis of apoptosis by Annexin V and PI staining in LX2 cells with treatment as indicated. Data shown are the mean  $\pm$  S.E.M. from three independent experiments. \* $P < 0.05$ ; \*\*  $P < 0.01$ .

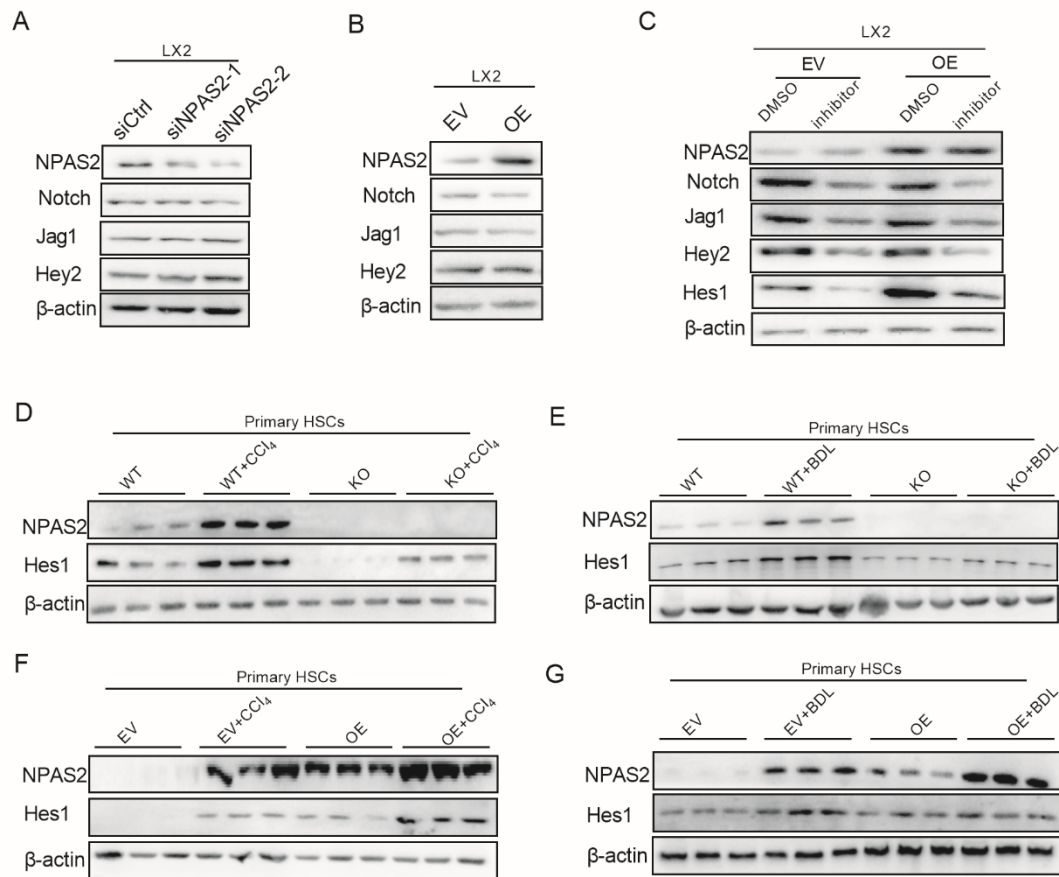

**Figure S4. NPAS2 activates Hes1 to activate HSCs.**

(A and B) western blot analysis for Notch signaling related genes were performed in LX2 cells, which were transiently transfected with expression vector or siRNA as indicated. NPAS2, expression vector encoding NPAS2; EV, empty vector; siNPAS2-1 and siNPAS2-2, siRNAs against NPAS2; siCtrl, control siRNA. (C) western blot analysis for Notch signaling related genes were performed in LX2 cells after inhibiting Notch signaling by GSI (inhibitor of Notch pathway). (D-F) western blot analysis for Hes1 were performed in primary HSCs with treatment as indicated.

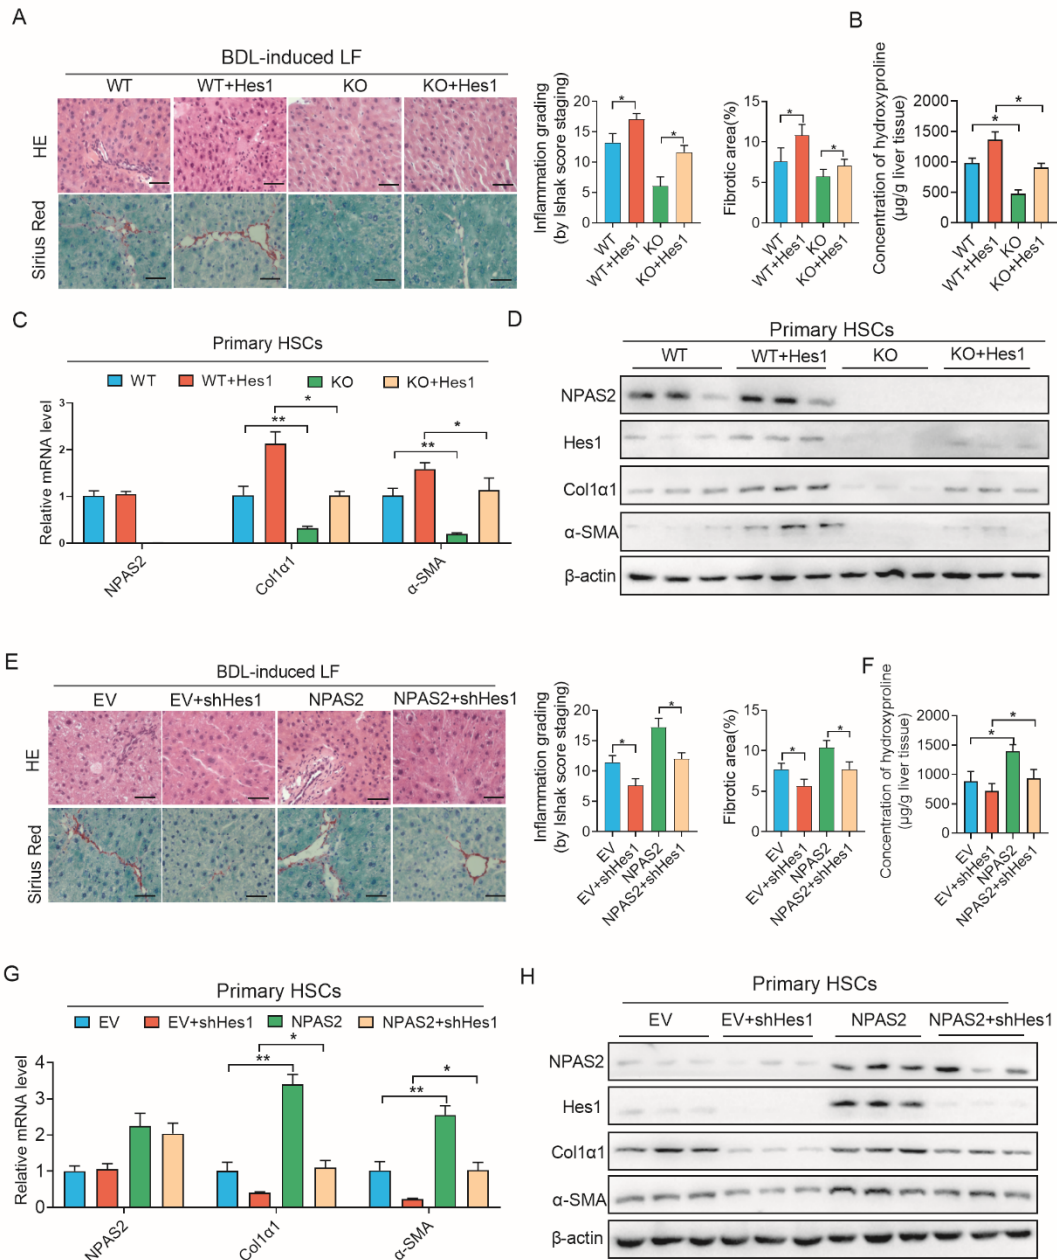

**Figure S5. Profibrotic effects of NPAS2 require Hes1 indicated by BDL-induced LF model.**

(A) H&E and picrosirius red staining revealed the reversed liver bridging fibrosis and collagen deposition in NPAS2-KO together with Lenti-Hes1 mice in BDL-induced LF model. (B) Hydroxyproline content in the BDL-induced liver tissues. (C and D) qPCR and western blot for Col1 $\alpha$ 1 and  $\alpha$ -SMA expression in the liver tissues with treatment as indicated in BDL-induced LF models. (E) H&E and picrosirius red staining revealed Lenti-shHes1 injection inhibits the aggravated liver bridging fibrosis and

collagen deposition in NPAS2-OE mice in BDL-induced LF model. (F) Hydroxyproline content in the BDL-induced liver tissues. (G and H) qPCR and western blot for Col1 $\alpha$ 1 and  $\alpha$ -SMA expression in the liver tissues with treatment as indicated in BDL-induced LF models. \*P < 0.05; \*\* P < 0.01.

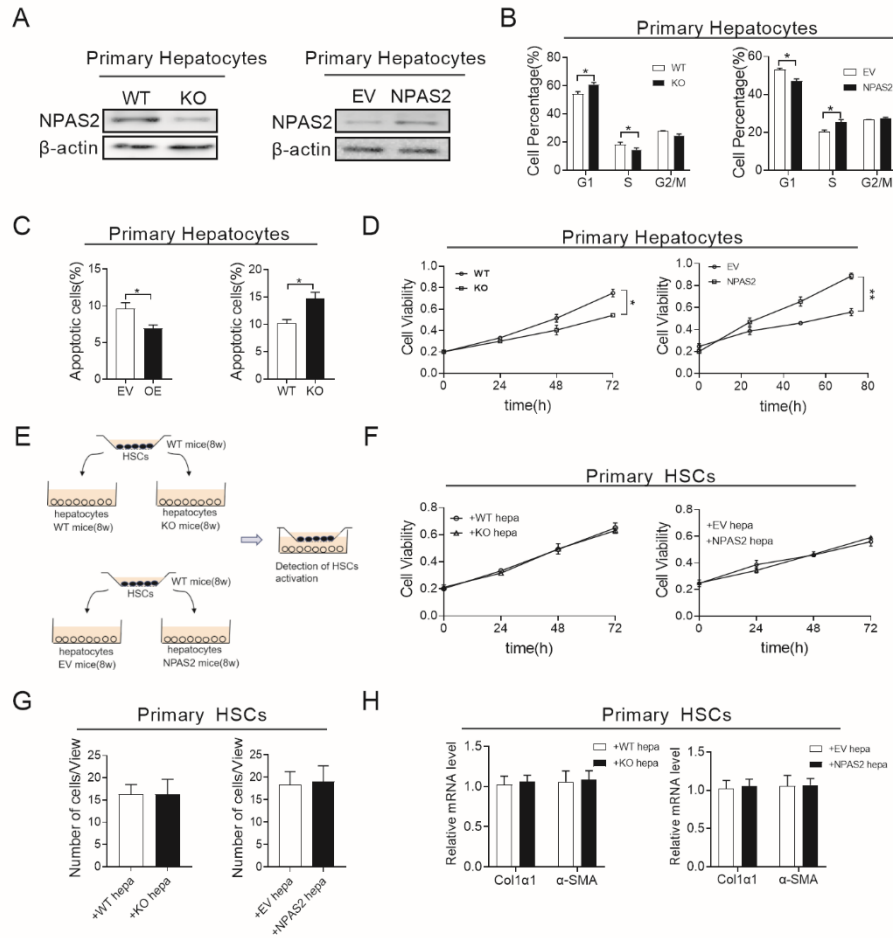

**Figure S6. Hepatic function detected by ALT/AST levels.**

(A, B, C, and D) ALT and AST levels in serum of CCl<sub>4</sub>- and BDL-induced liver fibrosis models. (E, F, G, and H) ALT and AST levels in serum of liver fibrosis mice with treatments as indicated in Fig6 and FigS5. \*P < 0.05; \*\* P < 0.01.

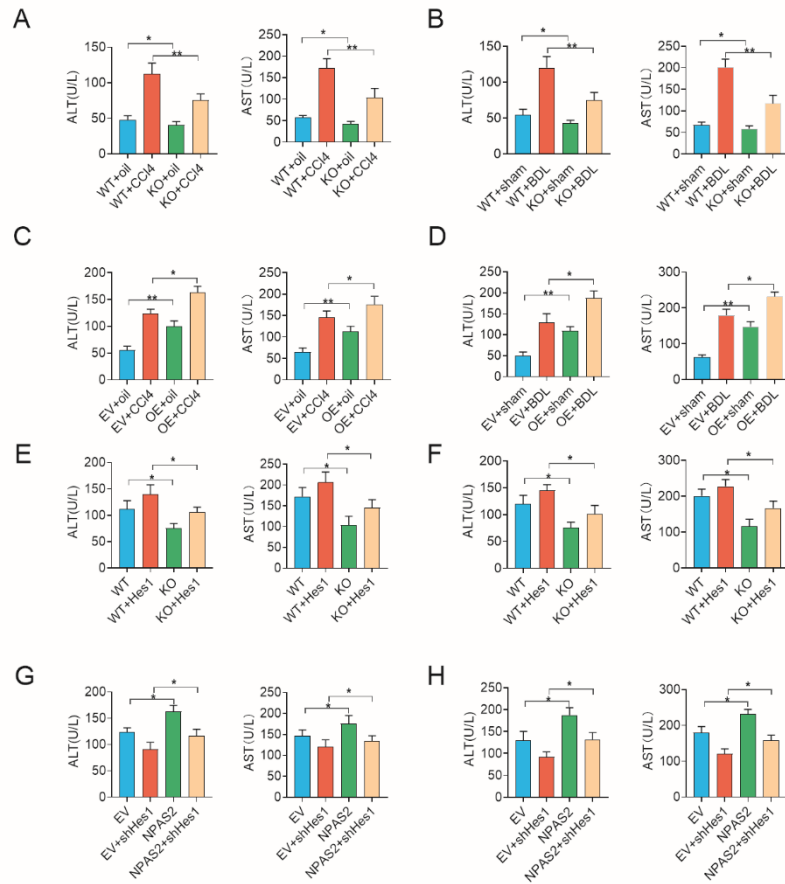

**Figure S7. The effects of NPAS2 in primary hepatocytes on activation of primary HSCs.**

(A) Western blot analysis for expression levels of NPAS2 in primary hepatocytes with treatments as indicated. (B) Cell cycle analysis by flow cytometry in primary hepatocytes proliferation from mice with treatments as indicated. (C) Flow cytometry analysis of apoptosis by Annexin V and PI staining in primary hepatocytes proliferation from mice with treatments as indicated. (D) MTS assay for primary hepatocytes proliferation from mice with treatments as indicated. (E) A schematic representation of co-culture experiments with primary HSCs and hepatocytes isolated from mice. (F, G and H) The effects of NPAS2 in primary hepatocytes on activation of primary HSCs. (F) Cell cycle analyses by flow cytometry, (G) Flow cytometry analyses of apoptosis by Annexin V and PI staining, (H) MTS assays. \*P < 0.05; \*\* P < 0.01.



| Links                                                    | Gene Symbol | Uniprot | Pseudogene | microRNA        | Integrated Score  | Number of Sources | Score Class |
|----------------------------------------------------------|-------------|---------|------------|-----------------|-------------------|-------------------|-------------|
| <a href="#">ID</a> <a href="#">GC</a> <a href="#">UP</a> | NPAS2       | Q99743  |            | hsa-miR-17-5p   | 0.953174880764457 | 21                | Very High   |
| <a href="#">ID</a> <a href="#">GC</a> <a href="#">UP</a> | NPAS2       | Q99743  |            | hsa-miR-106b-5p | 0.949287842598554 | 21                | Very High   |
| <a href="#">ID</a> <a href="#">GC</a> <a href="#">UP</a> | NPAS2       | Q99743  |            | hsa-miR-19a-3p  | 0.94745433865796  | 20                | Very High   |
| <a href="#">ID</a> <a href="#">GC</a> <a href="#">UP</a> | NPAS2       | Q99743  |            | hsa-miR-19b-3p  | 0.946721171167091 | 20                | Very High   |
| <a href="#">ID</a> <a href="#">GC</a> <a href="#">UP</a> | NPAS2       | Q99743  |            | hsa-miR-199b-5p | 0.92790341482925  | 23                | Very High   |
| <a href="#">ID</a> <a href="#">GC</a> <a href="#">UP</a> | NPAS2       | Q99743  |            | hsa-miR-218-5p  | 0.925841335645154 | 20                | Very High   |
| <a href="#">ID</a> <a href="#">GC</a> <a href="#">UP</a> | NPAS2       | Q99743  |            | hsa-miR-106a-5p | 0.924150085150512 | 20                | Very High   |
| <a href="#">ID</a> <a href="#">GC</a> <a href="#">UP</a> | NPAS2       | Q99743  |            | hsa-miR-20a-5p  | 0.916984223757973 | 19                | Very High   |
| <a href="#">ID</a> <a href="#">GC</a> <a href="#">UP</a> | NPAS2       | Q99743  |            | hsa-miR-93-5p   | 0.912459050350389 | 17                | Very High   |
| <a href="#">ID</a> <a href="#">GC</a> <a href="#">UP</a> | NPAS2       | Q99743  |            | hsa-miR-20b-5p  | 0.894406446503852 | 20                | Very High   |

**Figure S8. Top ten predicted miRNAs targeting NPAS2 based on microRNA Data**

**Integration Portal (mirDIP)-based target prediction programs**

## **Supplemental materials and methods**

### **Construction of reporter plasmids and site-directed mutagenesis**

Promoter sequences of Hes1 were obtained from UCSC Genome Browser. Then pGL3-Basic vectors (Promega, Madison, WI) inserted by truncated portions of Hes1 promoter was generally constructed by PCR amplification of selected regions with primers listed in Supplementary Table 3. This construct corresponds to the sequence from nt-2177 to nt+67 (relative to the transcriptional start site) of the 5'-flanking region of the human Hes1 gene. Site-directed mutagenesis was performed using the Q5 Site-Directed Mutagenesis Kit (NEB, E0552S) according to the manufacturer's instructions. The first E-box was mutated (underlined) to ACCGGA (wt, CACGTG). The sequences of PCR products were confirmed by sequencing (Sangon, Shanghai, China).

### **Co-culture of primary hepatocytes and primary HSCs**

To examine the effects of NPAS2 knockout or overexpression in hepatocytes on HSCs, primary hepatocytes were isolated from mice with treatments of knockout and upregulation in vivo. After thorough rinsing with PBS, the hepatocytes were co-cultured with primary HSCs from wild-type mice for 24 h in the upper-chamber of 0.4  $\mu$ m trans-well plates (3450, Corning). Antibodies against TGF $\beta$ 1 (sc-146, Santa Cruz) or control IgG (rabbit) was simultaneously added into the medium to neutralize the cytokine. Total RNA of HSCs was harvested 48-72 h later. The indicators of HSCs activation were used as described above.

## Supplementary Tables

**Supplementary Table 1. Sequences of primers and siRNAs.**

| <b>Primer name</b>                   |         | <b>Sequences</b>        |
|--------------------------------------|---------|-------------------------|
| <b>1. Primers for real-time PCR:</b> |         |                         |
| <i>NPAS2(human)</i>                  | forward | TCTGGATCACAGAGCACCTC    |
|                                      | reverse | CAGGAGCTCCAGGTCATCA     |
| <i>HES1(human)</i>                   | forward | AAGAAAGATAGCTCGCGGCA    |
|                                      | reverse | TACTTCCCCAGCACACTTGG    |
| <i>COL1A1(human)</i>                 | forward | CGGTGTGACTCGTGCAGC      |
|                                      | reverse | ACAGCCGCTTCACCTACAGC    |
| <i>ACTB(human)</i>                   | forward | AAAGCAAGTCCTCCAGCGTT    |
|                                      | reverse | CAGGATTCCCGTCTTAGTCCC   |
| <i>CCND1(human)</i>                  | forward | ATCAAGTGTGACCCGGACTG    |
|                                      | reverse | CTTGGGGTCCATGTTCTGCT    |
| <i>PERP(human)</i>                   | forward | TGTGGTGGAAATGCTCCCAA    |
|                                      | reverse | TACCCACGCGTACTCCAT      |
| <i>KLF10(human)</i>                  | forward | CGCTGTCCATTGCAGCTTAC    |
|                                      | reverse | TGCATGATGCCTTCGTGTTG    |
| <i>ITGB5(human)</i>                  | forward | GGAGCCAGAGTGTGGAAACA    |
|                                      | reverse | AGATAGCCAGGAGTGCAAGC    |
| <i>RASL11B(human)</i>                | forward | CCGGTTCCTCACCAAACGAT    |
|                                      | reverse | GGCTGTTCTCATGGACCTGAA   |
| <i>ITGA8(human)</i>                  | forward | CTCAGGAAACTGGCAGGAGAA   |
|                                      | reverse | CCAGCAACCAATTCAAGGTAAC  |
| <i>GATA4(human)</i>                  | forward | AAGACACCAGCAGCTCCTTC    |
|                                      | reverse | CCCGTAGTGAGATGACAGGC    |
| <i>NKIRAS1(human)</i>                | forward | AGAAGATGGGAAAGGGCTGC    |
|                                      | reverse | TCGCAATCTTCCATTCCAATAGT |
| <i>PAK1(human)</i>                   | forward | GGGAGTTTACGGGAATGCCA    |
|                                      | reverse | CCTGCGGGTTTTTCTTCTGC    |
| <i>miR-19a-3p(human)</i>             | forward | GGGGGGGTGTGCAAATCT      |
|                                      | reverse | GTGCGTGTTCGTGGAGTCG     |
| <i>miR-19b-3p(human)</i>             | forward | CACTGTTCTATGGTTAG       |
|                                      | reverse | CACTACCACAGTCAGTT       |

---

|                           |         |                            |
|---------------------------|---------|----------------------------|
| <i>miR-106a-5p(human)</i> | forward | GATGCTCAAAAAGTGCTTACAGTGCA |
|                           | reverse | TATGGTTGTTCTGCTCTCTGTCTC   |
| <i>miR-106b-5p(human)</i> | forward | CTGGAGTAAAGTGCTGACAGTG     |
|                           | reverse | GTGCAGGGTCCGAGGT           |
| <i>miR-218-5p(human)</i>  | forward | TTGTGCTTGATCTAACCATGT      |
|                           | reverse | CAGTGCGTGTCGTGGAGT         |
| <i>GAPDH(human)</i>       | forward | AATGGGCAGCCGTTAGGAAA       |
|                           | reverse | GCCCAATACGACCAAATCAGAG     |
| <i>U6(human)</i>          | forward | GCTTCGGCAGCACATATACTAAAAT  |
|                           | reverse | CGCTTCACGAATTTGCGTGTTCAT   |
| <i>NPAS2(mouse)</i>       | forward | TCCATGCTCCCTGGTAACACT      |
|                           | reverse | TCTGCAAGAATCCGATGACCTT     |
| <i>HES1(mouse)</i>        | forward | CACCGGACAAACCAAAGACG       |
|                           | reverse | GGAATGCCGGGAGCTATCTT       |
| <i>COL1A1(mouse)</i>      | forward | ACTGCAACATGGAGACAGGTCAGA   |
|                           | reverse | ATCGGTCATGCTCTCTCCAAACCA   |
| <i>ACTB(mouse)</i>        | forward | GGGGTGATGGTGGGAATG         |
|                           | reverse | GCAGGGTGGGATGCTCTT         |
| <i>GAPDH(mouse)</i>       | forward | TCAACAGCAACTCCCCTCTTCCA    |
|                           | reverse | TTGTCATTGAGAGCAATGCCAGCC   |

---

## 2. Primers for *HES1* promoter construct

|                         |         |                           |
|-------------------------|---------|---------------------------|
| (-2177/+67) <i>HES1</i> | forward | AAGGAATGAAGTGTCTGAGAACCGT |
| (-997/+42) <i>HES1</i>  | forward | TGCGTGCGTGTGTGTGTAGGAGGGC |
|                         | reverse | AGGTCCTGGTTCCTCTCTCCATCTG |

## 3. Primers for *HES1* promoter site-directed mutagenesis

|                                  |                                |
|----------------------------------|--------------------------------|
| (-2177/+67) <i>HES1</i> mutation | CGGCGCCCGCacCGgaGCACCCGGCGGGCG |
| (-2177/+67) <i>HES1</i> mutation | CAGTGTGTTAATCTGTATTAATTC       |

## 4. Primers used for ChIP in the *HES1* promoter

|             |                 |                           |
|-------------|-----------------|---------------------------|
| <i>HES1</i> | forward primer: | TAGGGGGTCCCTCCGGCGGGCGGTC |
|             | reverse primer: | CCCGCCGACGCACGACGGACGACC  |

## 5. siRNAs

|                      |            |                     |
|----------------------|------------|---------------------|
| <i>NPAS2</i> siRNA 1 | sense:     | CGUCGGAUGUCAUGGAUCA |
|                      | antisense: | UGAUCCAUGACAUCCGACG |
| <i>NPAS2</i> siRNA 2 | sense:     | UCAAAGAGCUCAGUCCAU  |
|                      | antisense: | AUGGAACUGAGCUCUUUGA |
| <i>Hes1</i> siRNA    | sense:     | ACGGTTCCTAGCGAGGTCC |
|                      | antisense: | AAUGGCUCCUCUUCAGAGC |

Control siRNA      sense:            UUCUCCGAACGUGUCACGU  
                                          antisense:            ACGUGACACGUUCGGAGAA

**6. mimic and inhibitor of miR-19b-3p**

miR-19b-3p mimic    forward            UGUGCAAUCCAUGCAAACUGA  
                                          reverse            AGUUUUGCAUGGAUUUGCACAUU  
 mimic control        forward            UUCUCCGAACGUGUCACGUTT  
                                          reverse            ACGUGACACGUUCGGAGAATT  
 miR-19b-3p inhibitor                    UCAGUUUUGCAUGGAUUUGCACA  
 inhibitor control                        CAGUACUUUUGUGUAGUACAA

**Supplementary Table 2. Primary antibodies used for Western blotting and Immunohistochemistry analysis.**

| <b>Antibody</b> | <b>Company (Cat. No.)</b> | <b>Working dilutions</b> |
|-----------------|---------------------------|--------------------------|
| NPAS2           | NOVUS (NBP1-31363)        | WB: 1/1000, IHC:1/200    |
| Hes1            | Abcam (ab71559)           | WB: 1/1000, IHC:1/200    |
| Col $\alpha$ 1  | Abcam(ab34710)            | WB: 1/2000, IHC:1/400    |
| $\alpha$ -SMA   | Proteintech (14395-1-AP)  | WB: 1/800, IHC:1/400     |
| Notch2          | Cell Signaling (#5732)    | WB: 1/1000               |
| Notch3          | Cell Signaling (#4053)    | WB: 1/1000               |
| Jag1            | Proteintech (66890-1-Ig)  | WB: 1/5000               |
| Hey2            | Proteintech (10597-1-AP)  | WB: 1/1000               |
| $\beta$ -actin  | Beijing TDY (TDY051C)     | WB: 1/3000               |
